# Supplementary material for: Aluminum(i) β-diketiminato complexes activate C(sp2)–F and C(sp3)–F bonds by different oxidative addition mechanisms: a DFT study
Source: Royal Society of Chemistry journal article supplement (doi:10.1039/c7cc03503a), 2017-01-01
Supplement: c7cc03503a1.pdf [file c7cc03503a1.pdf]

## Electronic Supplementary Information

### Aluminum(I) $\beta$ -Diketiminato Complexes Activate C(sp<sup>3</sup>)-F and C(sp<sup>2</sup>)-F Bonds by Different Oxidative Addition Mechanisms: A DFT Study

Chloe E. Pitsch and Xiaotai Wang\*

Department of Chemistry, University of Colorado Denver, Campus Box 194, P.O. Box 173364,  
Denver, Colorado 80217-3364, United States

| <b>Contents</b>                                                        | <b>Pages</b> |
|------------------------------------------------------------------------|--------------|
| 1. Fig. S1                                                             | S2           |
| 2. Fig. S2                                                             | S3           |
| 3. Fig. S3                                                             | S4           |
| 4. Fig. S4                                                             | S5           |
| 5. Cartesian coordinates, electronic energies, and Gibbs free energies | S6–S20       |

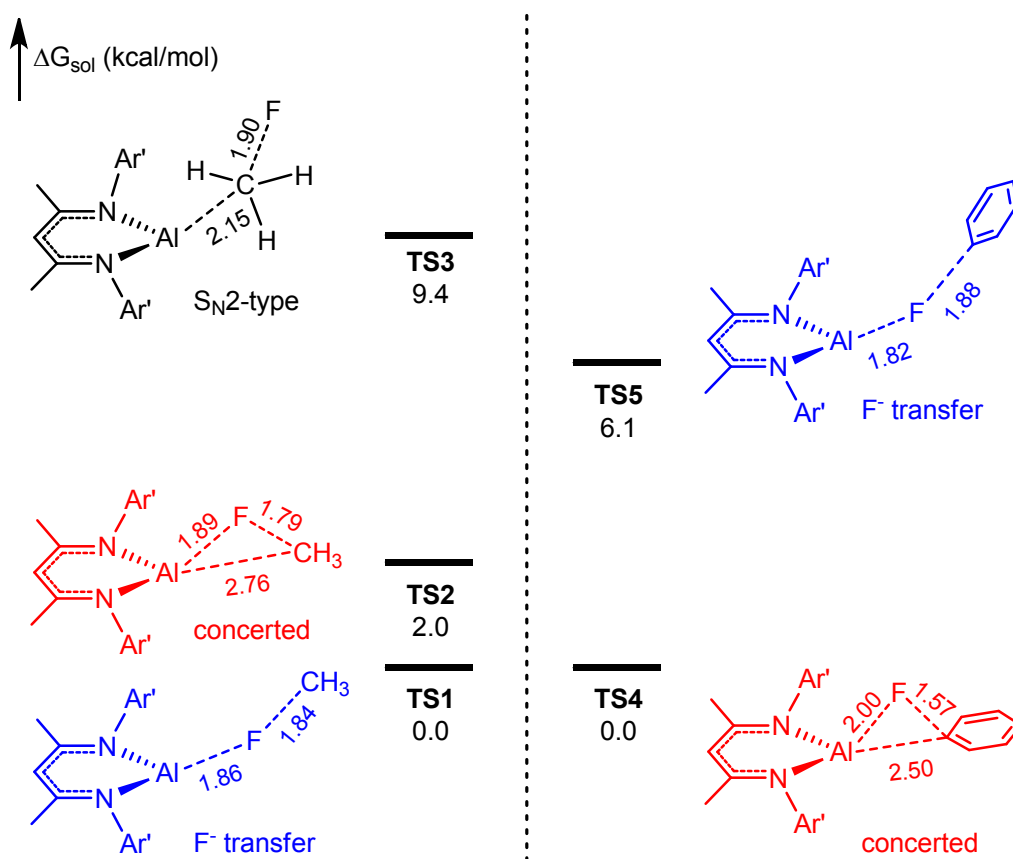

**Fig. S1** TPSSh/6-311++G(d,p)-SMD//TPSSh/6-31G(d,p)-computed geometries and relative free energies of transition states for various mechanisms of oxidative additions of  $\text{CH}_3\text{F}$  (left) and  $\text{C}_6\text{H}_5\text{F}$  (right) to **1**. **TS1** is 26.7 kcal/mol relative to **1** and  $\text{CH}_3\text{F}$ ; **TS4** is 32.9 kcal/mol relative to **1** and  $\text{C}_6\text{H}_5\text{F}$ . Selected bond/interatomic distances are given in Å (the same below).

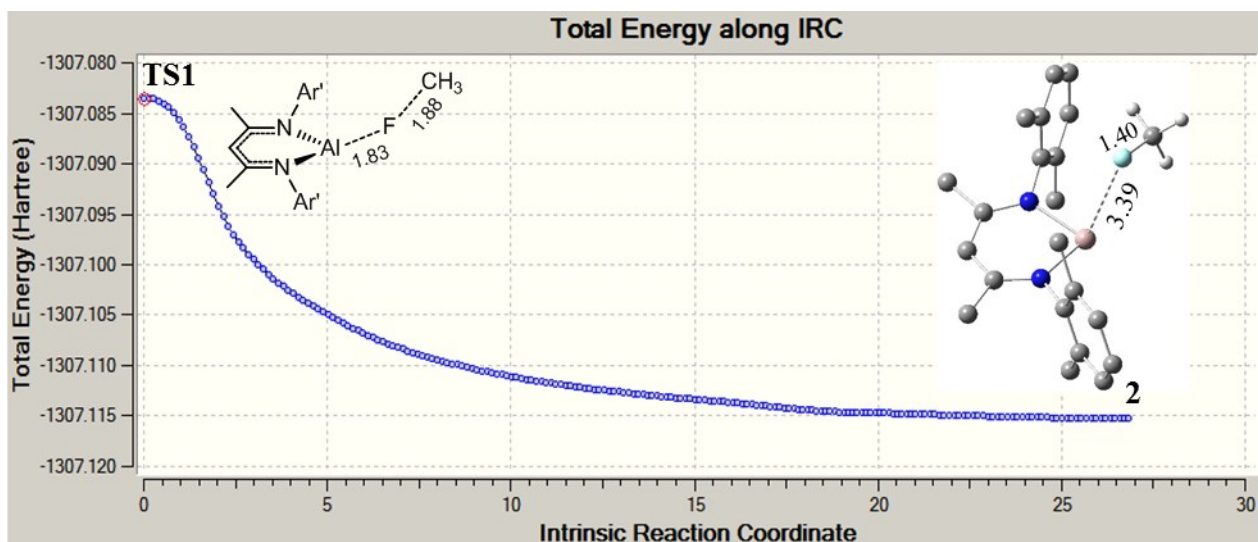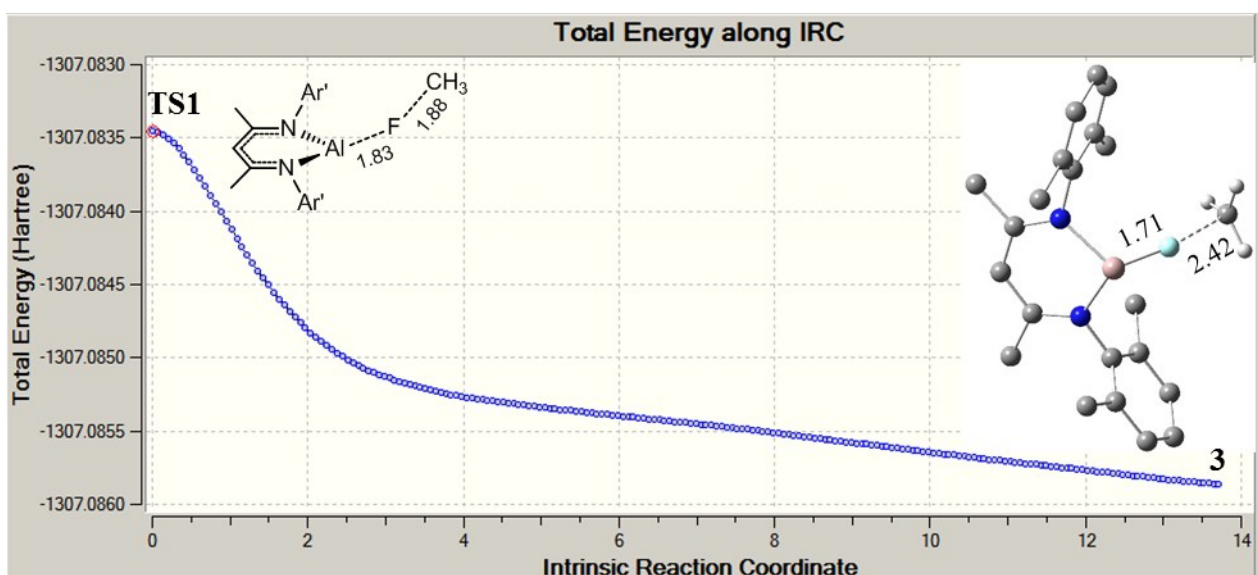

**Fig. S2** B3LYP-D3/6-31G(d,p)-computed IRC plots showing the connections of **TS1**. Top, **TS1**→**2** (starting VDW complex); bottom, **TS1**→**3** (ion pair product). Hydrogen atoms of Nac'Nac' are omitted for clarity in the ball-and-stick representations (the same below).

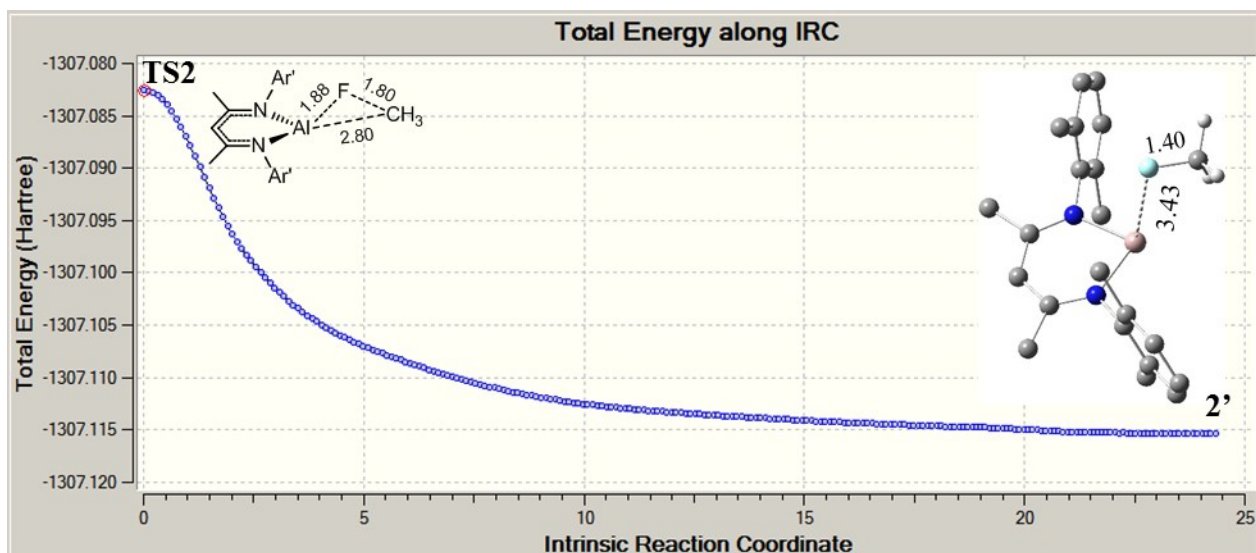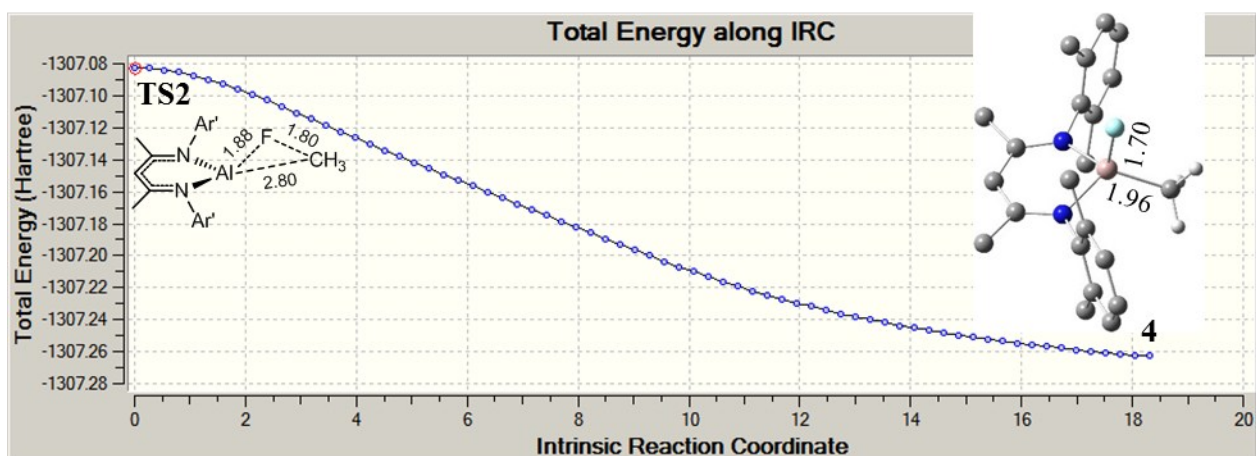

**Fig. S3** B3LYP-D3/6-31G(d,p)-computed IRC plots showing the connections of TS2. Top, TS2→2' (starting VDW complex); bottom, TS2→4 (Al<sup>III</sup> complex product).

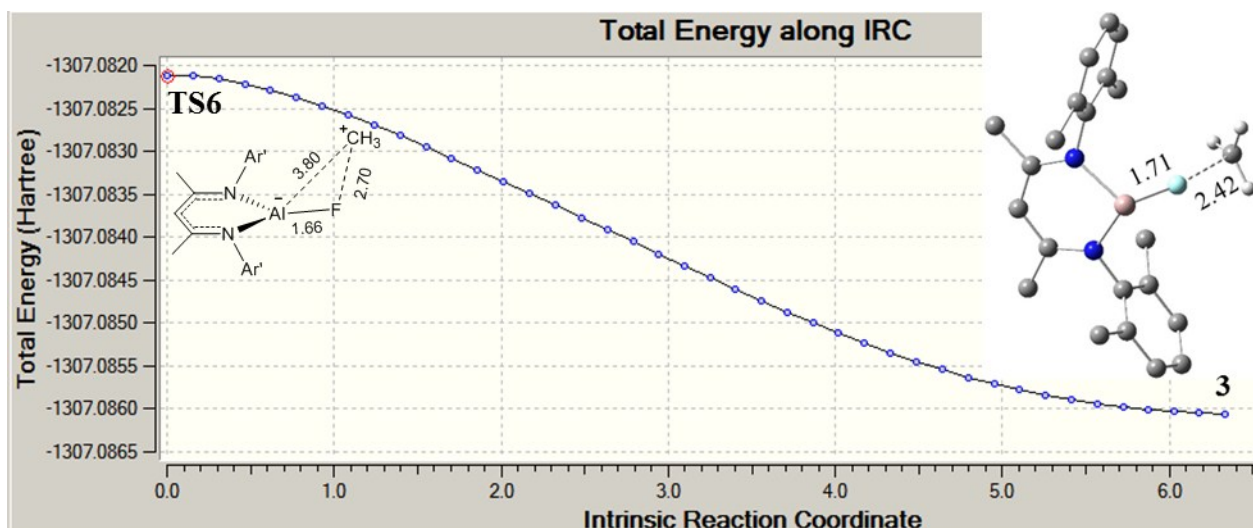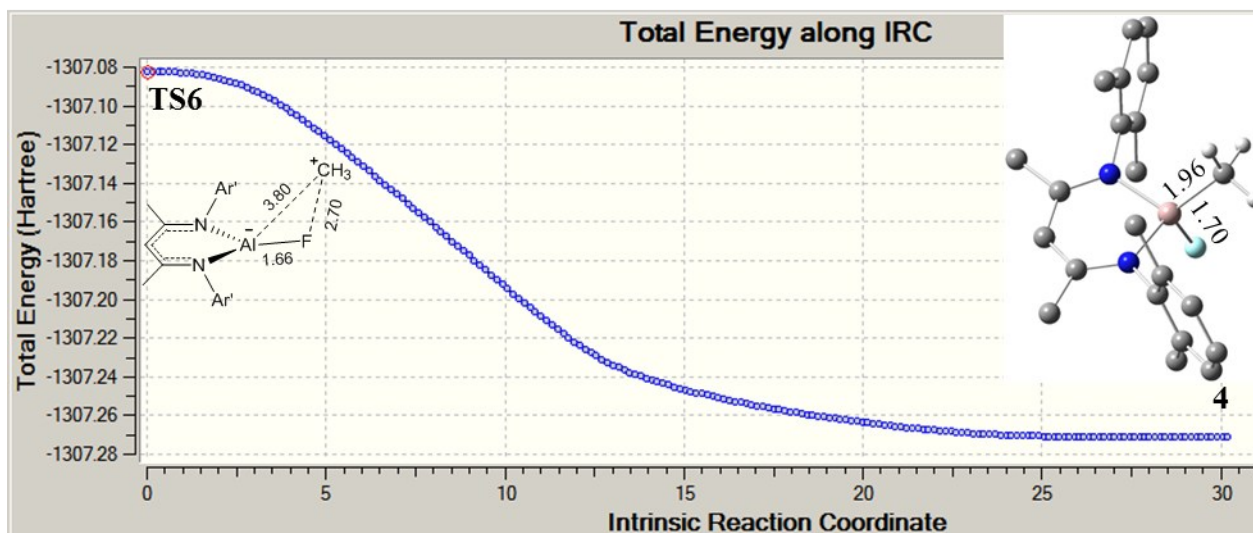

**Fig. S4** B3LYP-D3/6-31G(d,p)-computed IRC plots showing the connections of TS6. Top, TS6→3 (starting ion pair); bottom, TS6→4 (Al<sup>III</sup> complex product).

## Cartesian Coordinates, SCF Energies, and Free Energies (298.15 K and 1 atm)

### CH<sub>3</sub>F

SCF energy: -139.73719965 a.u.

SCF energy in solution: -139.79398824 a.u.

Free energy in solution: -139.77615724 a.u.

|   |           |           |           |
|---|-----------|-----------|-----------|
| C | 0.000000  | 0.000000  | -0.630126 |
| H | 0.000000  | 1.032132  | -1.001080 |
| H | -0.893853 | -0.516066 | -1.001080 |
| H | 0.893853  | -0.516066 | -1.001080 |
| F | 0.000000  | 0.000000  | 0.753777  |

### C<sub>5</sub>H<sub>11</sub>F

SCF energy: -297.01919876 a.u.

SCF energy in solution: -297.11415782 a.u.

Free energy in solution: -296.99171782 a.u.

|   |           |           |           |
|---|-----------|-----------|-----------|
| C | 1.922929  | 0.517689  | 0.000223  |
| H | 1.927676  | 1.162482  | -0.889412 |
| H | 1.928332  | 1.161770  | 0.890362  |
| C | 0.714212  | -0.402500 | 0.000328  |
| H | 0.772660  | -1.054614 | -0.880014 |
| H | 0.772405  | -1.054354 | 0.880865  |
| C | -0.610271 | 0.368708  | 0.000101  |
| H | -0.652467 | 1.029066  | 0.878247  |
| H | -0.652238 | 1.028689  | -0.878323 |
| C | -1.839847 | -0.547638 | 0.000087  |
| H | -1.797816 | -1.206699 | -0.877442 |
| H | -1.798036 | -1.206413 | 0.877841  |
| C | -3.160525 | 0.227983  | -0.000254 |
| H | -3.239928 | 0.870965  | -0.884390 |
| H | -4.022390 | -0.447103 | -0.000279 |
| H | -3.240189 | 0.871225  | 0.883665  |
| F | 3.093668  | -0.237829 | -0.000448 |

### C<sub>6</sub>H<sub>11</sub>F

SCF energy: -335.13920686 a.u.

SCF energy in solution: -335.24102437 a.u.

Free energy in solution: -335.10779737 a.u.

|   |           |           |           |
|---|-----------|-----------|-----------|
| C | 1.853099  | 0.000001  | -0.286286 |
| C | 1.141945  | 1.268162  | 0.212690  |
| C | -0.345857 | 1.262962  | -0.176288 |
| C | -1.032965 | 0.000000  | 0.329690  |
| C | -0.345856 | -1.262964 | -0.176288 |

|   |           |           |           |
|---|-----------|-----------|-----------|
| C | 1.141945  | -1.268161 | 0.212689  |
| H | -0.863336 | 2.144733  | 0.216833  |
| H | 1.231227  | 1.324001  | 1.306945  |
| H | 1.629268  | 2.165304  | -0.184986 |
| H | 1.861087  | 0.000001  | -1.385256 |
| H | 2.900697  | -0.000002 | 0.036470  |
| H | -1.047803 | -0.000001 | 1.430496  |
| H | -0.863332 | -2.144735 | 0.216837  |
| H | -0.448532 | -1.286827 | -1.269104 |
| H | 1.231225  | -1.323998 | 1.306945  |
| H | 1.629273  | -2.165302 | -0.184983 |
| H | -0.448529 | 1.286826  | -1.269105 |
| F | -2.365012 | 0.000001  | -0.102036 |

### C<sub>6</sub>H<sub>5</sub>F

SCF energy: -331.49025946 a.u.

SCF energy in solution: -331.59356131 a.u.

Free energy in solution: -331.52988531 a.u.

|   |           |           |           |
|---|-----------|-----------|-----------|
| C | 1.836371  | 0.000004  | -0.000007 |
| C | 1.135747  | 1.208997  | 0.000023  |
| C | -0.260438 | 1.217681  | -0.000007 |
| C | -0.932208 | -0.000025 | 0.000057  |
| C | -0.260437 | -1.217694 | 0.000046  |
| C | 1.135784  | -1.208968 | -0.000037 |
| H | 2.921797  | 0.000037  | -0.000039 |
| H | 1.674874  | 2.151616  | -0.000002 |
| H | -0.829829 | 2.140636  | -0.000048 |
| H | -0.829744 | -2.140698 | 0.000039  |
| H | 1.674884  | -2.151603 | -0.000065 |
| F | -2.282321 | 0.000005  | -0.000038 |

### C<sub>6</sub>H<sub>2</sub>F<sub>4</sub>

SCF energy: -629.166322423 a.u.

SCF energy in solution: -629.37863616 a.u.

Free energy in solution: -629.34332216 a.u.

|   |           |           |           |
|---|-----------|-----------|-----------|
| C | 1.197649  | 0.697396  | 0.000038  |
| C | -0.000078 | 1.402823  | 0.000093  |
| C | -1.197761 | 0.697463  | 0.000025  |
| C | -1.197588 | -0.697388 | 0.000082  |
| C | 0.000068  | -1.402845 | 0.000007  |
| C | 1.197778  | -0.697441 | 0.000060  |
| F | -2.367651 | 1.354430  | -0.000022 |

|   |           |           |           |
|---|-----------|-----------|-----------|
| F | 2.367446  | 1.354622  | -0.000120 |
| F | -2.367449 | -1.354584 | -0.000084 |
| F | 2.367584  | -1.354476 | 0.000016  |
| H | 0.000332  | 2.485855  | 0.000130  |
| H | -0.000118 | -2.485849 | -0.000067 |

**C<sub>6</sub>F<sub>6</sub>**

SCF energy: -827.59613629 a.u.

SCF energy in solution: -827.87944851 a.u.

Free energy in solution: -827.86294951 a.u.

|   |           |           |           |
|---|-----------|-----------|-----------|
| C | 1.234539  | 0.647464  | -0.000198 |
| C | 1.177934  | -0.745610 | -0.000203 |
| C | -0.056581 | -1.393485 | -0.000607 |
| C | -1.234450 | -0.647585 | -0.000202 |
| C | -1.178032 | 0.745496  | -0.000200 |
| C | 0.056579  | 1.393445  | -0.000098 |
| F | -2.307179 | 1.458849  | 0.000581  |
| F | -0.110928 | -2.727998 | 0.000138  |
| F | 2.307233  | -1.458684 | 0.000101  |
| F | 2.417742  | 1.267003  | 0.000591  |
| F | -2.417783 | -1.266834 | 0.000111  |
| F | 0.110922  | 2.727847  | -0.000517 |

**1**

SCF energy: -1167.36508164 a.u.

SCF energy in solution: -1167.61997572 a.u.

Free energy in solution: -1167.26152372 a.u.

|    |           |           |           |
|----|-----------|-----------|-----------|
| N  | 1.403780  | -0.000209 | 0.292022  |
| C  | 1.254399  | -0.000453 | 1.624771  |
| C  | -0.000003 | -0.000608 | 2.252515  |
| C  | -1.254404 | -0.000459 | 1.624763  |
| N  | -1.403782 | -0.000213 | 0.292020  |
| H  | -0.000006 | -0.000810 | 3.335071  |
| Al | 0.000012  | -0.000099 | -1.156204 |
| C  | 2.481381  | -0.000524 | 2.513947  |
| H  | 3.105138  | 0.875839  | 2.313378  |
| H  | 2.205083  | -0.000858 | 3.569558  |
| H  | 3.105427  | -0.876563 | 2.312886  |
| C  | -2.481391 | -0.000522 | 2.513934  |
| H  | -3.105439 | -0.876560 | 2.312870  |
| H  | -2.205101 | -0.000855 | 3.569546  |
| H  | -3.105142 | 0.875843  | 2.313356  |
| C  | 2.746403  | 0.000037  | -0.234939 |
| C  | 3.379951  | 1.227475  | -0.507991 |

|   |           |           |           |
|---|-----------|-----------|-----------|
| C | 3.380238  | -1.227153 | -0.508438 |
| C | 4.672981  | 1.206645  | -1.042360 |
| C | 4.673263  | -1.205824 | -1.042798 |
| C | 5.319303  | 0.000534  | -1.306492 |
| H | 5.172432  | 2.148194  | -1.255120 |
| H | 5.172935  | -2.147179 | -1.255899 |
| H | 6.322877  | 0.000726  | -1.721959 |
| C | -2.746400 | 0.000023  | -0.234945 |
| C | -3.380207 | -1.227169 | -0.508495 |
| C | -3.379979 | 1.227458  | -0.507939 |
| C | -4.673232 | -1.205848 | -1.042856 |
| C | -4.673009 | 1.206620  | -1.042310 |
| C | -5.319300 | 0.000506  | -1.306499 |
| H | -5.172882 | -2.147206 | -1.255996 |
| H | -5.172484 | 2.148167  | -1.255021 |
| H | -6.322876 | 0.000693  | -1.721964 |
| C | 2.671393  | 2.532775  | -0.238164 |
| H | 1.779581  | 2.630847  | -0.869034 |
| H | 2.328997  | 2.606743  | 0.799759  |
| H | 3.325593  | 3.384223  | -0.442943 |
| C | 2.671998  | -2.532719 | -0.239066 |
| H | 2.329585  | -2.607111 | 0.798821  |
| H | 1.780234  | -2.630805 | -0.870001 |
| H | 3.326418  | -3.383936 | -0.444104 |
| C | -2.671461 | 2.532762  | -0.238030 |
| H | -2.329059 | 2.606672  | 0.799895  |
| H | -1.779658 | 2.630902  | -0.868902 |
| H | -3.325689 | 3.384203  | -0.442749 |
| C | -2.671936 | -2.532730 | -0.239179 |
| H | -1.780177 | -2.630771 | -0.870130 |
| H | -2.329509 | -2.607156 | 0.798701  |
| H | -3.326340 | -3.383954 | -0.444243 |

**2**

SCF energy: -1307.11556032 a.u.

SCF energy in solution: -1307.41816650 a.u.

Free energy in solution: -1307.02571750 a.u.

|    |           |           |           |
|----|-----------|-----------|-----------|
| N  | -1.321600 | -0.678602 | 0.204342  |
| C  | -1.134004 | -1.534305 | 1.219767  |
| C  | 0.136621  | -1.877159 | 1.704002  |
| C  | 1.370250  | -1.383873 | 1.252724  |
| N  | 1.486599  | -0.548443 | 0.210586  |
| H  | 0.167336  | -2.572209 | 2.533391  |
| Al | 0.053899  | 0.186658  | -1.001613 |
| C  | -2.334099 | -2.170791 | 1.891326  |





|   |           |           |           |
|---|-----------|-----------|-----------|
| C | 2.729832  | -2.209485 | -1.737210 |
| H | 2.392059  | -2.916726 | -0.971872 |
| H | 1.839642  | -1.916193 | -2.306703 |
| H | 3.405828  | -2.737571 | -2.414853 |
| C | 2.649389  | 1.726822  | 1.463079  |
| H | 1.807292  | 2.275808  | 1.030221  |
| H | 2.237550  | 1.108072  | 2.267034  |
| H | 3.330329  | 2.454901  | 1.912877  |
| C | 0.000795  | 4.069535  | -0.923259 |
| H | 0.000161  | 3.312074  | -1.711619 |
| H | 0.898394  | 4.692321  | -0.991694 |
| H | -0.895642 | 4.693985  | -0.991781 |
| F | 0.000129  | 3.420603  | 0.318250  |

**3**

SCF energy: -1307.08609803 a.u.

SCF energy in solution: -1307.39194785 a.u.

Free energy in solution: -1307.00269085 a.u.

|    |           |           |           |
|----|-----------|-----------|-----------|
| N  | -1.415232 | -0.568165 | 0.234357  |
| C  | -1.257432 | -1.372531 | 1.294487  |
| C  | -0.000005 | -1.778595 | 1.769912  |
| C  | 1.257398  | -1.372561 | 1.294413  |
| N  | 1.415163  | -0.568148 | 0.234314  |
| H  | 0.000013  | -2.440851 | 2.625818  |
| Al | -0.000055 | 0.096585  | -0.899135 |
| C  | -2.482752 | -1.859668 | 2.036007  |
| H  | -3.176557 | -2.362723 | 1.356407  |
| H  | -2.210395 | -2.547300 | 2.837888  |
| H  | -3.028881 | -1.014972 | 2.467610  |
| C  | 2.482777  | -1.859965 | 2.035651  |
| H  | 3.029063  | -1.015417 | 2.467339  |
| H  | 2.210477  | -2.547736 | 2.837432  |
| H  | 3.176421  | -2.362952 | 1.355827  |
| C  | -2.745611 | -0.153924 | -0.143688 |
| C  | -3.469424 | -0.916744 | -1.078740 |
| C  | -3.268096 | 1.029418  | 0.411260  |
| C  | -4.747508 | -0.478494 | -1.443471 |
| C  | -4.549847 | 1.431820  | 0.019752  |
| C  | -5.286486 | 0.685563  | -0.898565 |
| H  | -5.319216 | -1.056982 | -2.164208 |
| H  | -4.967818 | 2.343019  | 0.439148  |
| H  | -6.279356 | 1.013489  | -1.192848 |
| C  | 2.745541  | -0.153893 | -0.143717 |
| C  | 3.268018  | 1.029466  | 0.411219  |
| C  | 3.469412  | -0.916780 | -1.078663 |

|   |           |           |           |
|---|-----------|-----------|-----------|
| C | 4.549749  | 1.431898  | 0.019680  |
| C | 4.747479  | -0.478503 | -1.443421 |
| C | 5.286402  | 0.685625  | -0.898614 |
| H | 4.967707  | 2.343111  | 0.439057  |
| H | 5.319239  | -1.057057 | -2.164064 |
| H | 6.279271  | 1.013553  | -1.192898 |
| C | -2.876186 | -2.170638 | -1.673112 |
| H | -1.959293 | -1.941704 | -2.230745 |
| H | -2.596691 | -2.897137 | -0.901756 |
| H | -3.580217 | -2.653285 | -2.355726 |
| C | -2.451083 | 1.843609  | 1.382870  |
| H | -2.143736 | 1.252658  | 2.253385  |
| H | -1.536552 | 2.203134  | 0.898744  |
| H | -3.016638 | 2.707322  | 1.742064  |
| C | 2.876321  | -2.170870 | -1.672758 |
| H | 2.596869  | -2.897199 | -0.901224 |
| H | 1.959426  | -1.942161 | -2.230482 |
| H | 3.580426  | -2.653618 | -2.355225 |
| C | 2.451053  | 1.843594  | 1.382927  |
| H | 1.536314  | 2.202860  | 0.899016  |
| H | 2.144066  | 1.252691  | 2.253600  |
| H | 3.016499  | 2.707479  | 1.741875  |
| C | 0.000502  | 4.084938  | -0.153242 |
| H | 0.932496  | 4.197114  | -0.686201 |
| H | 0.000687  | 4.103842  | 0.928350  |
| H | -0.931577 | 4.197782  | -0.685912 |
| F | -0.000241 | 1.806115  | -0.961703 |

**4**

SCF energy: -1307.27149642 a.u.

SCF energy in solution: -1307.57364271 a.u.

Free energy in solution: -1307.17965671 a.u.

|    |           |           |           |
|----|-----------|-----------|-----------|
| N  | 1.422501  | -0.278211 | 0.424437  |
| C  | 1.259003  | -0.707427 | 1.682460  |
| C  | -0.000040 | -0.961709 | 2.252747  |
| C  | -1.259045 | -0.707388 | 1.682394  |
| N  | -1.422472 | -0.278220 | 0.424351  |
| H  | -0.000070 | -1.326587 | 3.271668  |
| Al | 0.000063  | -0.159472 | -0.859719 |
| C  | 2.479804  | -0.900176 | 2.554813  |
| H  | 2.999368  | 0.051770  | 2.703535  |
| H  | 2.208200  | -1.305039 | 3.530480  |
| H  | 3.196796  | -1.573972 | 2.077221  |
| C  | -2.479893 | -0.899891 | 2.554730  |
| H  | -3.196950 | -1.573663 | 2.077204  |

|                                              |           |           |           |    |           |           |           |
|----------------------------------------------|-----------|-----------|-----------|----|-----------|-----------|-----------|
| H                                            | -2.208370 | -1.304652 | 3.530462  |    |           |           |           |
| H                                            | -2.999344 | 0.052144  | 2.703301  | N  | 0.264273  | -1.615246 | -0.095984 |
| C                                            | 2.740041  | 0.076043  | -0.040936 | C  | -0.276739 | -2.486701 | -0.959076 |
| C                                            | 3.185521  | 1.400505  | 0.134226  | C  | -1.632169 | -2.460712 | -1.319364 |
| C                                            | 3.528651  | -0.886936 | -0.699790 | C  | -2.574918 | -1.490982 | -0.946026 |
| C                                            | 4.445818  | 1.750474  | -0.361932 | N  | -2.317056 | -0.533608 | -0.043198 |
| C                                            | 4.783542  | -0.494048 | -1.181342 | H  | -1.963620 | -3.216695 | -2.019896 |
| C                                            | 5.240866  | 0.811900  | -1.017536 | Al | -0.661351 | -0.247941 | 1.068185  |
| H                                            | 4.801208  | 2.769449  | -0.233330 | C  | 0.600847  | -3.538376 | -1.607226 |
| H                                            | 5.404177  | -1.225993 | -1.691266 | H  | 1.162401  | -4.094334 | -0.850627 |
| H                                            | 6.215985  | 1.098435  | -1.400863 | H  | 0.006206  | -4.240319 | -2.194406 |
| C                                            | -2.740001 | 0.076039  | -0.041065 | H  | 1.342100  | -3.074824 | -2.265472 |
| C                                            | -3.528706 | -0.886934 | -0.699839 | C  | -3.927457 | -1.530901 | -1.627115 |
| C                                            | -3.185458 | 1.400494  | 0.134170  | H  | -4.080842 | -0.622173 | -2.218159 |
| C                                            | -4.783602 | -0.493990 | -1.181334 | H  | -4.011641 | -2.395065 | -2.288199 |
| C                                            | -4.445758 | 1.750517  | -0.361938 | H  | -4.738529 | -1.563570 | -0.894167 |
| C                                            | -5.240858 | 0.811981  | -1.017531 | C  | 1.699509  | -1.593239 | 0.034678  |
| H                                            | -5.404307 | -1.225920 | -1.691195 | C  | 2.320076  | -2.276549 | 1.096744  |
| H                                            | -4.801126 | 2.769490  | -0.233267 | C  | 2.448723  | -0.829111 | -0.882925 |
| H                                            | -6.215994 | 1.098547  | -1.400792 | C  | 3.710763  | -2.181334 | 1.227442  |
| C                                            | 2.320775  | 2.413544  | 0.845148  | C  | 3.835383  | -0.761715 | -0.719276 |
| H                                            | 1.365812  | 2.547977  | 0.328714  | C  | 4.464806  | -1.428132 | 0.330244  |
| H                                            | 2.080922  | 2.099245  | 1.867204  | H  | 4.201314  | -2.704747 | 2.044079  |
| H                                            | 2.819573  | 3.384504  | 0.899187  | H  | 4.419730  | -0.157773 | -1.406824 |
| C                                            | 3.038525  | -2.304610 | -0.874125 | H  | 5.541907  | -1.356166 | 0.450585  |
| H                                            | 2.838682  | -2.780944 | 0.092985  | C  | -3.328273 | 0.467071  | 0.189586  |
| H                                            | 2.099286  | -2.335350 | -1.432974 | C  | -3.313412 | 1.647102  | -0.579353 |
| H                                            | 3.781945  | -2.910200 | -1.398796 | C  | -4.278611 | 0.268615  | 1.209452  |
| C                                            | -2.320704 | 2.413436  | 0.845212  | C  | -4.287867 | 2.618923  | -0.325446 |
| H                                            | -2.080674 | 2.098904  | 1.867155  | C  | -5.234785 | 1.265334  | 1.433090  |
| H                                            | -1.365834 | 2.548065  | 0.328658  | C  | -5.244301 | 2.432042  | 0.670830  |
| H                                            | -2.819573 | 3.384344  | 0.899551  | H  | -4.289674 | 3.532047  | -0.914892 |
| C                                            | -3.038741 | -2.304673 | -0.874096 | H  | -5.975245 | 1.121579  | 2.215645  |
| H                                            | -2.099529 | -2.335550 | -1.432974 | H  | -5.993186 | 3.196690  | 0.856314  |
| H                                            | -2.838936 | -2.780981 | 0.093035  | C  | 1.502855  | -3.093584 | 2.067865  |
| H                                            | -3.782246 | -2.910207 | -1.398713 | H  | 0.830266  | -2.454655 | 2.652740  |
| C                                            | 0.000075  | 1.433344  | -2.001253 | H  | 0.869568  | -3.823460 | 1.551617  |
| H                                            | 0.000695  | 2.393888  | -1.474524 | H  | 2.147934  | -3.634300 | 2.765543  |
| H                                            | -0.880475 | 1.430344  | -2.655675 | C  | 1.764670  | -0.093962 | -2.010688 |
| H                                            | 0.879965  | 1.429714  | -2.656557 | H  | 1.205042  | -0.772323 | -2.664095 |
| F                                            | 0.000100  | -1.593619 | -1.770411 | H  | 1.046947  | 0.638288  | -1.630160 |
|                                              |           |           |           | H  | 2.495246  | 0.441751  | -2.621469 |
| <b>5</b>                                     |           |           |           | C  | -4.255444 | -0.988492 | 2.044476  |
| SCF energy: -1498.86968454 a.u.              |           |           |           | H  | -4.320879 | -1.891836 | 1.428029  |
| SCF energy in solution: -1499.21982626 a.u.  |           |           |           | H  | -3.319235 | -1.064193 | 2.610451  |
| Free energy in solution: -1498.77936226 a.u. |           |           |           | H  | -5.084758 | -1.001770 | 2.756531  |

|   |           |          |           |
|---|-----------|----------|-----------|
| C | -2.260409 | 1.863716 | -1.640661 |
| H | -1.274764 | 2.032726 | -1.191478 |
| H | -2.161297 | 0.997365 | -2.302607 |
| H | -2.499327 | 2.736849 | -2.253933 |
| F | 0.976586  | 2.755227 | -0.513563 |
| C | 4.879263  | 2.351651 | 0.743073  |
| C | 3.830342  | 2.001378 | 1.597012  |
| C | 2.503456  | 2.142573 | 1.187422  |
| C | 2.262034  | 2.634891 | -0.088690 |
| C | 3.281530  | 2.989605 | -0.963374 |
| C | 4.603089  | 2.846618 | -0.533741 |
| H | 3.032630  | 3.365950 | -1.949597 |
| H | 5.414858  | 3.120872 | -1.201240 |
| H | 5.908140  | 2.235304 | 1.069618  |
| H | 4.040967  | 1.603592 | 2.584849  |
| H | 1.667757  | 1.858992 | 1.817439  |

6

SCF energy: -1499.01661294 a.u.

SCF energy in solution: -1499.36655330 a.u.

Free energy in solution: -1498.92031530 a.u.

|    |           |           |           |
|----|-----------|-----------|-----------|
| N  | -1.490055 | -1.062428 | -0.022159 |
| C  | -1.378110 | -2.302489 | -0.523744 |
| C  | -0.147631 | -2.948212 | -0.723173 |
| C  | 1.134381  | -2.385885 | -0.593545 |
| N  | 1.349913  | -1.170458 | -0.076965 |
| H  | -0.192056 | -3.956223 | -1.114397 |
| Al | -0.017891 | -0.134642 | 0.780290  |
| C  | -2.631872 | -3.037575 | -0.943744 |
| H  | -3.109243 | -2.531214 | -1.788762 |
| H  | -2.405771 | -4.063545 | -1.236743 |
| H  | -3.366067 | -3.051219 | -0.133370 |
| C  | 2.310815  | -3.182263 | -1.111525 |
| H  | 3.086968  | -3.278645 | -0.347284 |
| H  | 2.002630  | -4.177732 | -1.433709 |
| H  | 2.771611  | -2.667070 | -1.960759 |
| C  | -2.779906 | -0.418908 | -0.043718 |
| C  | -3.161637 | 0.281695  | -1.205189 |
| C  | -3.603159 | -0.463593 | 1.097061  |
| C  | -4.394734 | 0.941995  | -1.208177 |
| C  | -4.827053 | 0.216231  | 1.053146  |
| C  | -5.222411 | 0.913556  | -0.086376 |
| H  | -4.699274 | 1.490282  | -2.095602 |
| H  | -5.473314 | 0.193417  | 1.926405  |
| H  | -6.174729 | 1.435750  | -0.100545 |

|   |           |           |           |
|---|-----------|-----------|-----------|
| C | 2.675672  | -0.607649 | -0.120144 |
| C | 3.537028  | -0.774070 | 0.980723  |
| C | 3.043383  | 0.164194  | -1.238758 |
| C | 4.790560  | -0.150879 | 0.936114  |
| C | 4.306515  | 0.764450  | -1.244707 |
| C | 5.175164  | 0.611789  | -0.165173 |
| H | 5.466642  | -0.267110 | 1.778868  |
| H | 4.601149  | 1.367916  | -2.098977 |
| H | 6.150220  | 1.090227  | -0.180411 |
| C | -2.235717 | 0.360198  | -2.395169 |
| H | -1.342374 | 0.943353  | -2.144830 |
| H | -1.890074 | -0.626447 | -2.719695 |
| H | -2.728340 | 0.845005  | -3.241852 |
| C | -3.186111 | -1.235800 | 2.325881  |
| H | -3.041248 | -2.298140 | 2.096331  |
| H | -2.233575 | -0.878843 | 2.727054  |
| H | -3.946804 | -1.161404 | 3.107094  |
| C | 2.071721  | 0.386795  | -2.371405 |
| H | 1.631039  | -0.548575 | -2.730884 |
| H | 1.245656  | 1.022799  | -2.033556 |
| H | 2.559142  | 0.883436  | -3.214195 |
| C | 3.119748  | -1.598137 | 2.175690  |
| H | 2.183316  | -1.233952 | 2.607411  |
| H | 2.946646  | -2.645271 | 1.899581  |
| H | 3.893317  | -1.580208 | 2.947539  |
| F | 0.006955  | -0.526571 | 2.430750  |
| C | 0.426105  | 4.608530  | 0.062589  |
| C | 1.526502  | 3.826059  | 0.417284  |
| C | 1.374119  | 2.452015  | 0.615708  |
| C | 0.127341  | 1.803754  | 0.460465  |
| C | -0.965818 | 2.629542  | 0.120571  |
| C | -0.824200 | 4.005424  | -0.079180 |
| H | -1.957698 | 2.200956  | 0.012457  |
| H | -1.691945 | 4.605323  | -0.343047 |
| H | 0.540903  | 5.678014  | -0.094468 |
| H | 2.504729  | 4.284393  | 0.540595  |
| H | 2.255355  | 1.879828  | 0.894092  |

TS1

SCF energy: -1307.08345410 a.u.

SCF energy in solution: -1307.38737812 a.u.

Free energy in solution: -1306.99544212 a.u.

1 imaginary frequency: -267.92 cm<sup>-1</sup>

|   |           |           |          |
|---|-----------|-----------|----------|
| N | -1.344283 | -0.758565 | 0.037499 |
| C | -1.162355 | -1.718319 | 0.953185 |

|    |           |           |           |
|----|-----------|-----------|-----------|
| C  | 0.106916  | -2.148264 | 1.369619  |
| C  | 1.337973  | -1.554316 | 1.039609  |
| N  | 1.463302  | -0.608159 | 0.102909  |
| H  | 0.133675  | -2.946432 | 2.100416  |
| Al | 0.053578  | -0.026657 | -1.180142 |
| C  | -2.370301 | -2.360263 | 1.604395  |
| H  | -3.095432 | -2.675428 | 0.848498  |
| H  | -2.080128 | -3.226247 | 2.201897  |
| H  | -2.887793 | -1.649953 | 2.256572  |
| C  | 2.560744  | -2.002633 | 1.812911  |
| H  | 2.968179  | -1.168951 | 2.394252  |
| H  | 2.318931  | -2.818008 | 2.496549  |
| H  | 3.357614  | -2.328554 | 1.138575  |
| C  | -2.652497 | -0.186197 | -0.111084 |
| C  | -3.485281 | -0.588798 | -1.172442 |
| C  | -3.053445 | 0.821385  | 0.790484  |
| C  | -4.726629 | 0.041212  | -1.321387 |
| C  | -4.300974 | 1.427853  | 0.605999  |
| C  | -5.133836 | 1.044719  | -0.444549 |
| H  | -5.377270 | -0.262414 | -2.137171 |
| H  | -4.617394 | 2.207636  | 1.294390  |
| H  | -6.098116 | 1.526510  | -0.578376 |
| C  | 2.755500  | -0.010147 | -0.108895 |
| C  | 3.090882  | 1.153155  | 0.609108  |
| C  | 3.638469  | -0.568394 | -1.053141 |
| C  | 4.338529  | 1.743337  | 0.382717  |
| C  | 4.877092  | 0.052571  | -1.252398 |
| C  | 5.229247  | 1.197624  | -0.540382 |
| H  | 4.608071  | 2.640810  | 0.933512  |
| H  | 5.568070  | -0.369834 | -1.977214 |
| H  | 6.194337  | 1.667064  | -0.708349 |
| C  | -3.049364 | -1.682733 | -2.115555 |
| H  | -2.128399 | -1.402620 | -2.641499 |
| H  | -2.828299 | -2.611855 | -1.577802 |
| H  | -3.822488 | -1.893236 | -2.859215 |
| C  | -2.156950 | 1.225825  | 1.936703  |
| H  | -2.154970 | 0.474397  | 2.735582  |
| H  | -1.122247 | 1.330109  | 1.603615  |
| H  | -2.484091 | 2.172186  | 2.375725  |
| C  | 3.252391  | -1.802813 | -1.830068 |
| H  | 3.011843  | -2.643071 | -1.169036 |
| H  | 2.356057  | -1.614083 | -2.433204 |
| H  | 4.059661  | -2.115247 | -2.497626 |
| C  | 2.104919  | 1.748071  | 1.583516  |
| H  | 1.184876  | 2.015808  | 1.056949  |
| H  | 1.825435  | 1.037553  | 2.369635  |

|   |           |          |           |
|---|-----------|----------|-----------|
| H | 2.511328  | 2.643597 | 2.061166  |
| C | -0.892623 | 3.386855 | -0.299480 |
| H | -0.555457 | 4.022103 | -1.106743 |
| H | -0.377306 | 3.476490 | 0.646787  |
| H | -1.939877 | 3.119245 | -0.274133 |
| F | -0.212100 | 1.776404 | -0.980884 |

**TS2**

SCF energy: -1307.08255141 a.u.

SCF energy in solution: -1307.38429839 a.u.

Free energy in solution: -1306.99233039 a.u.

1 imaginary frequency: -508.37 cm<sup>-1</sup>

|    |           |           |           |
|----|-----------|-----------|-----------|
| N  | -1.409417 | 0.597745  | -0.073735 |
| C  | -1.255632 | 1.744289  | -0.745843 |
| C  | 0.000000  | 2.308399  | -1.023965 |
| C  | 1.255632  | 1.744289  | -0.745843 |
| N  | 1.409417  | 0.597745  | -0.073735 |
| H  | 0.000000  | 3.251633  | -1.554924 |
| Al | 0.000000  | -0.461810 | 0.848813  |
| C  | -2.480447 | 2.481363  | -1.248049 |
| H  | -3.177129 | 2.681224  | -0.428434 |
| H  | -2.207090 | 3.427752  | -1.717527 |
| H  | -3.026067 | 1.875103  | -1.977692 |
| C  | 2.480446  | 2.481364  | -1.248049 |
| H  | 3.026066  | 1.875104  | -1.977692 |
| H  | 2.207089  | 3.427752  | -1.717527 |
| H  | 3.177129  | 2.681224  | -0.428434 |
| C  | -2.735713 | 0.059520  | 0.082060  |
| C  | -3.476075 | 0.362911  | 1.241950  |
| C  | -3.252692 | -0.793484 | -0.914096 |
| C  | -4.746604 | -0.205412 | 1.390345  |
| C  | -4.527869 | -1.339385 | -0.727173 |
| C  | -5.271597 | -1.052006 | 0.416008  |
| H  | -5.326343 | 0.022895  | 2.280938  |
| H  | -4.937229 | -1.996923 | -1.489836 |
| H  | -6.259359 | -1.485178 | 0.546070  |
| C  | 2.735713  | 0.059520  | 0.082059  |
| C  | 3.252692  | -0.793483 | -0.914096 |
| C  | 3.476075  | 0.362912  | 1.241950  |
| C  | 4.527869  | -1.339384 | -0.727174 |
| C  | 4.746604  | -0.205412 | 1.390344  |
| C  | 5.271596  | -1.052005 | 0.416007  |
| H  | 4.937229  | -1.996922 | -1.489836 |
| H  | 5.326342  | 0.022895  | 2.280938  |
| H  | 6.259359  | -1.485177 | 0.546069  |

|   |           |           |           |
|---|-----------|-----------|-----------|
| C | -2.910393 | 1.283348  | 2.295253  |
| H | -2.003244 | 0.854540  | 2.738386  |
| H | -2.623009 | 2.253216  | 1.874263  |
| H | -3.636101 | 1.459492  | 3.093829  |
| C | -2.448404 | -1.110672 | -2.151830 |
| H | -2.165201 | -0.203453 | -2.697004 |
| H | -1.518287 | -1.619703 | -1.885038 |
| H | -3.017369 | -1.749139 | -2.833130 |
| C | 2.910393  | 1.283348  | 2.295253  |
| H | 2.623009  | 2.253216  | 1.874263  |
| H | 2.003244  | 0.854540  | 2.738386  |
| H | 3.636101  | 1.459492  | 3.093829  |
| C | 2.448404  | -1.110672 | -2.151831 |
| H | 1.518287  | -1.619702 | -1.885038 |
| H | 2.165201  | -0.203452 | -2.697004 |
| H | 3.017369  | -1.749138 | -2.833131 |
| C | 0.000003  | -3.260763 | 1.002129  |
| H | 0.914714  | -3.153647 | 1.567585  |
| H | 0.000003  | -3.992939 | 0.202538  |
| H | -0.914707 | -3.153649 | 1.567587  |
| F | 0.000000  | -1.978607 | -0.258575 |

**TS3**

SCF energy: -1307.05755174 a.u.

SCF energy in solution: -1307.38054202 a.u.

Free energy in solution: -1306.98481202 a.u.

1 imaginary frequency: -497.30 cm<sup>-1</sup>

|    |           |           |           |
|----|-----------|-----------|-----------|
| N  | -1.399416 | -0.744374 | 0.123137  |
| C  | -1.252765 | -1.554644 | 1.181630  |
| C  | 0.000000  | -2.010404 | 1.623316  |
| C  | 1.252765  | -1.554644 | 1.181630  |
| N  | 1.399416  | -0.744374 | 0.123137  |
| H  | 0.000000  | -2.688475 | 2.467001  |
| Al | 0.000000  | -0.199404 | -1.105758 |
| C  | -2.475697 | -1.957414 | 1.972882  |
| H  | -3.268757 | -2.321619 | 1.313880  |
| H  | -2.234332 | -2.728485 | 2.706079  |
| H  | -2.882051 | -1.088925 | 2.501706  |
| C  | 2.475697  | -1.957414 | 1.972882  |
| H  | 2.882051  | -1.088925 | 2.501706  |
| H  | 2.234332  | -2.728485 | 2.706079  |
| H  | 3.268757  | -2.321619 | 1.313880  |
| C  | -2.689216 | -0.148748 | -0.140642 |
| C  | -3.530229 | -0.752016 | -1.098093 |
| C  | -3.051581 | 1.046719  | 0.515356  |

|   |           |           |           |
|---|-----------|-----------|-----------|
| C | -4.749821 | -0.138288 | -1.397984 |
| C | -4.284068 | 1.625557  | 0.180683  |
| C | -5.124564 | 1.046573  | -0.765703 |
| H | -5.407229 | -0.595596 | -2.132527 |
| H | -4.578254 | 2.547359  | 0.675298  |
| H | -6.073762 | 1.515378  | -1.008747 |
| C | 2.689216  | -0.148748 | -0.140642 |
| C | 3.051581  | 1.046719  | 0.515356  |
| C | 3.530229  | -0.752016 | -1.098093 |
| C | 4.284068  | 1.625557  | 0.180683  |
| C | 4.749821  | -0.138288 | -1.397984 |
| C | 5.124564  | 1.046573  | -0.765703 |
| H | 4.578254  | 2.547359  | 0.675298  |
| H | 5.407229  | -0.595596 | -2.132527 |
| H | 6.073762  | 1.515378  | -1.008747 |
| C | -3.120909 | -2.034540 | -1.782154 |
| H | -2.239778 | -1.882818 | -2.418445 |
| H | -2.855606 | -2.815212 | -1.060978 |
| H | -3.927061 | -2.414796 | -2.414591 |
| C | -2.165591 | 1.725000  | 1.536677  |
| H | -1.497844 | 1.020272  | 2.039670  |
| H | -1.536051 | 2.503348  | 1.078513  |
| H | -2.778504 | 2.208215  | 2.303880  |
| C | 3.120909  | -2.034540 | -1.782154 |
| H | 2.855606  | -2.815212 | -1.060978 |
| H | 2.239778  | -1.882818 | -2.418445 |
| H | 3.927061  | -2.414796 | -2.414591 |
| C | 2.165591  | 1.725000  | 1.536677  |
| H | 1.536051  | 2.503348  | 1.078513  |
| H | 1.497844  | 1.020272  | 2.039670  |
| H | 2.778504  | 2.208215  | 2.303880  |
| C | 0.000000  | 1.970440  | -1.070747 |
| H | 0.000000  | 1.595207  | -0.052677 |
| H | -0.932415 | 2.245723  | -1.537620 |
| H | 0.932415  | 2.245723  | -1.537620 |
| F | 0.000000  | 3.518049  | 0.044125  |

**TS4**

SCF energy: -1498.83480560 a.u.

SCF energy in solution: -1499.18255350 a.u.

Free energy in solution: -1498.74310450 a.u.

1 imaginary frequency: -384.83 cm<sup>-1</sup>

|   |           |           |           |
|---|-----------|-----------|-----------|
| N | 1.412580  | -1.258974 | -0.000259 |
| C | 1.257197  | -2.521746 | -0.414918 |
| C | -0.000026 | -3.125410 | -0.583416 |

|    |           |           |           |
|----|-----------|-----------|-----------|
| C  | -1.257238 | -2.521724 | -0.414921 |
| N  | -1.412601 | -1.258947 | -0.000265 |
| H  | -0.000034 | -4.158527 | -0.906354 |
| Al | 0.000003  | -0.025976 | 0.631179  |
| C  | 2.484730  | -3.354725 | -0.719216 |
| H  | 3.156167  | -3.381234 | 0.144571  |
| H  | 2.213027  | -4.376967 | -0.987014 |
| H  | 3.056344  | -2.917286 | -1.543446 |
| C  | -2.484784 | -3.354686 | -0.719212 |
| H  | -3.056408 | -2.917232 | -1.543426 |
| H  | -2.213094 | -4.376927 | -0.987029 |
| H  | -3.156207 | -3.381202 | 0.144586  |
| C  | 2.737910  | -0.701258 | 0.092622  |
| C  | 3.408641  | -0.730498 | 1.332207  |
| C  | 3.317390  | -0.088063 | -1.037769 |
| C  | 4.663904  | -0.119907 | 1.429222  |
| C  | 4.575793  | 0.510559  | -0.896340 |
| C  | 5.244469  | 0.502578  | 0.326304  |
| H  | 5.186170  | -0.135142 | 2.382090  |
| H  | 5.032543  | 0.985675  | -1.760649 |
| H  | 6.218494  | 0.974708  | 0.417026  |
| C  | -2.737927 | -0.701222 | 0.092626  |
| C  | -3.317412 | -0.088028 | -1.037763 |
| C  | -3.408649 | -0.730457 | 1.332215  |
| C  | -4.575813 | 0.510599  | -0.896327 |
| C  | -4.663910 | -0.119861 | 1.429237  |
| C  | -5.244480 | 0.502623  | 0.326321  |
| H  | -5.032566 | 0.985715  | -1.760634 |
| H  | -5.186171 | -0.135093 | 2.382108  |
| H  | -6.218503 | 0.974758  | 0.417049  |
| C  | 2.783744  | -1.405476 | 2.528645  |
| H  | 1.860231  | -0.893169 | 2.825997  |
| H  | 2.510306  | -2.444117 | 2.312239  |
| H  | 3.467047  | -1.402860 | 3.381849  |
| C  | 2.607659  | -0.063924 | -2.370782 |
| H  | 2.225317  | -1.050632 | -2.649852 |
| H  | 1.745187  | 0.606636  | -2.342181 |
| H  | 3.282633  | 0.274263  | -3.161458 |
| C  | -2.783748 | -1.405433 | 2.528652  |
| H  | -2.510309 | -2.444074 | 2.312246  |
| H  | -1.860235 | -0.893124 | 2.826001  |
| H  | -3.467048 | -1.402816 | 3.381858  |
| C  | -2.607696 | -0.063914 | -2.370784 |
| H  | -1.745130 | 0.606522  | -2.342160 |
| H  | -2.225498 | -1.050663 | -2.649910 |
| H  | -3.282634 | 0.274406  | -3.161432 |

|   |           |          |           |
|---|-----------|----------|-----------|
| F | 0.000046  | 1.080972 | -1.027238 |
| C | 0.000041  | 5.082655 | 0.335696  |
| C | -1.207817 | 4.388307 | 0.200162  |
| C | -1.224725 | 3.017279 | -0.047461 |
| C | 0.000033  | 2.338811 | -0.075858 |
| C | 1.224798  | 3.017266 | -0.047422 |
| C | 1.207896  | 4.388294 | 0.200200  |
| H | 2.157306  | 2.474402 | -0.153732 |
| H | 2.153180  | 4.918594 | 0.280236  |
| H | 0.000044  | 6.150892 | 0.527013  |
| H | -2.153097 | 4.918617 | 0.280168  |
| H | -2.157236 | 2.474426 | -0.153801 |

**TS5**

SCF energy: -1498.82265073 a.u.

SCF energy in solution: -1499.17407637 a.u.

Free energy in solution: -1498.73535937 a.u.

1 imaginary frequency: -171.20 cm<sup>-1</sup>

|    |           |           |           |
|----|-----------|-----------|-----------|
| N  | -1.402878 | -1.427423 | 0.075729  |
| C  | -1.253652 | -2.380546 | 1.004299  |
| C  | 0.000003  | -2.902957 | 1.366911  |
| C  | 1.253677  | -2.380590 | 1.004284  |
| N  | 1.402913  | -1.427493 | 0.075700  |
| H  | -0.000008 | -3.706387 | 2.092316  |
| Al | 0.000001  | -0.895417 | -1.195174 |
| C  | -2.475473 | -2.909899 | 1.723678  |
| H  | -3.247020 | -3.210635 | 1.008900  |
| H  | -2.222056 | -3.762847 | 2.355272  |
| H  | -2.919864 | -2.132487 | 2.353115  |
| C  | 2.475483  | -2.909949 | 1.723684  |
| H  | 2.919869  | -2.132541 | 2.353128  |
| H  | 2.222050  | -3.762892 | 2.355276  |
| H  | 3.247039  | -3.210692 | 1.008918  |
| C  | -2.687157 | -0.798041 | -0.085690 |
| C  | -3.560403 | -1.231055 | -1.101023 |
| C  | -3.019065 | 0.281403  | 0.757107  |
| C  | -4.776534 | -0.556439 | -1.264699 |
| C  | -4.244148 | 0.928307  | 0.560734  |
| C  | -5.118199 | 0.516838  | -0.445056 |
| H  | -5.458131 | -0.880833 | -2.046399 |
| H  | -4.509390 | 1.762735  | 1.204865  |
| H  | -6.064196 | 1.031150  | -0.587854 |
| C  | 2.687182  | -0.798086 | -0.085685 |
| C  | 3.019009  | 0.281372  | 0.757120  |
| C  | 3.560459  | -1.231038 | -1.101014 |

|                                                 |           |           |           |    |           |           |           |
|-------------------------------------------------|-----------|-----------|-----------|----|-----------|-----------|-----------|
| C                                               | 4.244039  | 0.928376  | 0.560753  | H  | 0.000069  | -2.434934 | 2.631704  |
| C                                               | 4.776544  | -0.556337 | -1.264676 | Al | -0.000035 | 0.050046  | -0.849370 |
| C                                               | 5.118124  | 0.516969  | -0.445033 | C  | -2.484506 | -1.850167 | 2.043837  |
| H                                               | 4.509212  | 1.762822  | 1.204889  | H  | -3.177586 | -2.337688 | 1.352179  |
| H                                               | 5.458170  | -0.880677 | -2.046374 | H  | -2.215088 | -2.552841 | 2.833370  |
| H                                               | 6.064083  | 1.031351  | -0.587830 | H  | -3.028191 | -1.011320 | 2.488885  |
| C                                               | -3.193384 | -2.395184 | -1.987517 | C  | 2.484589  | -1.850206 | 2.043675  |
| H                                               | -2.294464 | -2.170252 | -2.575621 | H  | 3.028316  | -1.011401 | 2.488749  |
| H                                               | -2.962403 | -3.292360 | -1.402385 | H  | 2.215204  | -2.552929 | 2.833176  |
| H                                               | -4.005865 | -2.635958 | -2.677998 | H  | 3.177618  | -2.337694 | 1.351943  |
| C                                               | -2.065635 | 0.734372  | 1.835245  | C  | -2.748271 | -0.115856 | -0.122371 |
| H                                               | -1.853387 | -0.060623 | 2.558556  | C  | -3.460824 | -0.856130 | -1.082843 |
| H                                               | -1.108834 | 1.032079  | 1.399811  | C  | -3.275413 | 1.046951  | 0.469272  |
| H                                               | -2.469243 | 1.591375  | 2.379812  | C  | -4.737370 | -0.411441 | -1.444300 |
| C                                               | 3.193497  | -2.395165 | -1.987532 | C  | -4.556234 | 1.454868  | 0.078318  |
| H                                               | 2.962606  | -3.292380 | -1.402421 | C  | -5.282453 | 0.734867  | -0.868452 |
| H                                               | 2.294536  | -2.170273 | -2.575588 | H  | -5.302092 | -0.969847 | -2.185834 |
| H                                               | 4.005966  | -2.635856 | -2.678055 | H  | -4.980738 | 2.351241  | 0.521769  |
| C                                               | 2.065524  | 0.734231  | 1.835252  | H  | -6.273793 | 1.069202  | -1.160515 |
| H                                               | 1.108721  | 1.031890  | 1.399794  | C  | 2.748286  | -0.115835 | -0.122463 |
| H                                               | 1.853276  | -0.060833 | 2.558489  | C  | 3.275602  | 1.046833  | 0.469306  |
| H                                               | 2.469059  | 1.591218  | 2.379894  | C  | 3.460720  | -0.856079 | -1.083052 |
| F                                               | 0.000038  | 0.884994  | -1.286155 | C  | 4.556445  | 1.454659  | 0.078325  |
| C                                               | -1.224466 | 3.262649  | -0.333075 | C  | 4.737289  | -0.411480 | -1.444533 |
| C                                               | -1.213969 | 4.604418  | 0.082193  | C  | 5.282528  | 0.734701  | -0.868580 |
| C                                               | -0.000001 | 5.267127  | 0.288402  | H  | 4.981076  | 2.350925  | 0.521871  |
| C                                               | 1.213977  | 4.604386  | 0.082351  | H  | 5.301914  | -0.969865 | -2.186158 |
| C                                               | 1.224493  | 3.262618  | -0.332919 | H  | 6.273889  | 1.068963  | -1.160657 |
| C                                               | 0.000016  | 2.656754  | -0.494947 | C  | -2.862750 | -2.094587 | -1.704614 |
| H                                               | 2.157184  | 2.728894  | -0.493138 | H  | -1.933458 | -1.856919 | -2.239895 |
| H                                               | 2.155201  | 5.126578  | 0.240527  | H  | -2.601323 | -2.846187 | -0.950776 |
| H                                               | -0.000008 | 6.305544  | 0.607018  | H  | -3.556012 | -2.552287 | -2.414588 |
| H                                               | -2.155201 | 5.126634  | 0.240246  | C  | -2.470977 | 1.833867  | 1.470485  |
| H                                               | -2.157151 | 2.728942  | -0.493396 | H  | -2.155023 | 1.216837  | 2.319685  |
| <b>TS6</b>                                      |           |           |           | H  | -1.555473 | 2.233700  | 1.006101  |
| SCF energy: -1307.0821111 a.u.                  |           |           |           | H  | -3.050280 | 2.674532  | 1.860656  |
| SCF energy in solution: -1307.39268190 a.u.     |           |           |           | C  | 2.862509  | -2.094431 | -1.704899 |
| Free energy in solution: -1307.00423190 a.u.    |           |           |           | H  | 2.601034  | -2.846057 | -0.951105 |
| 1 imaginary frequency: -170.33 cm <sup>-1</sup> |           |           |           | H  | 1.933220  | -1.856636 | -2.240134 |
| N                                               | -1.417240 | -0.541397 | 0.256038  | H  | 3.555705  | -2.552145 | -2.414928 |
| C                                               | -1.258275 | -1.355195 | 1.313211  | C  | 2.471329  | 1.833718  | 1.470670  |
| C                                               | 0.000041  | -1.764989 | 1.781906  | H  | 1.555885  | 2.233771  | 1.006356  |
| C                                               | 1.258319  | -1.355177 | 1.313149  | H  | 2.155280  | 1.216609  | 2.319775  |
| N                                               | 1.417247  | -0.541321 | 0.255996  | H  | 3.050782  | 2.674225  | 1.860959  |
|                                                 |           |           |           | C  | 0.000376  | 3.765994  | -0.038408 |
|                                                 |           |           |           | H  | 0.916974  | 3.934090  | -0.592735 |

|   |           |          |           |
|---|-----------|----------|-----------|
| H | 0.000389  | 4.103035 | 0.996415  |
| H | -0.916174 | 3.934246 | -0.592758 |
| F | -0.000832 | 1.545166 | -1.570198 |

**TS (F<sup>-</sup> transfer) for C<sub>5</sub>H<sub>11</sub>F**

SCF energy: -1464.36718814 a.u.

SCF energy in solution: -1464.70919175 a.u.

Free energy in solution: -1464.21246775 a.u.

1 imaginary frequency: -118.55 cm<sup>-1</sup>

|    |           |           |           |
|----|-----------|-----------|-----------|
| N  | 0.513010  | -2.021922 | 0.075618  |
| C  | -0.065306 | -2.997719 | -0.635155 |
| C  | -1.428167 | -2.997292 | -0.970395 |
| C  | -2.332768 | -1.936575 | -0.782717 |
| N  | -2.046827 | -0.855219 | -0.051076 |
| H  | -1.790006 | -3.849322 | -1.531605 |
| Al | -0.450040 | -0.621215 | 1.118746  |
| C  | 0.781570  | -4.148464 | -1.138847 |
| H  | 1.387185  | -4.565548 | -0.328897 |
| H  | 0.159013  | -4.939618 | -1.560463 |
| H  | 1.480761  | -3.812674 | -1.910931 |
| C  | -3.673919 | -2.029993 | -1.480516 |
| H  | -3.768127 | -1.231929 | -2.224519 |
| H  | -3.791293 | -2.990593 | -1.984713 |
| H  | -4.499031 | -1.895151 | -0.775880 |
| C  | 1.945794  | -1.946784 | 0.106452  |
| C  | 2.657482  | -2.415468 | 1.227156  |
| C  | 2.611125  | -1.341925 | -0.980261 |
| C  | 4.048924  | -2.261752 | 1.245509  |
| C  | 4.002609  | -1.205526 | -0.922573 |
| C  | 4.720218  | -1.658951 | 0.183489  |
| H  | 4.607241  | -2.620710 | 2.106115  |
| H  | 4.523220  | -0.736522 | -1.753886 |
| H  | 5.799790  | -1.543366 | 0.217011  |
| C  | -3.014758 | 0.206788  | 0.026568  |
| C  | -2.933910 | 1.269868  | -0.892295 |
| C  | -3.992320 | 0.188325  | 1.040531  |
| C  | -3.863992 | 2.310343  | -0.796832 |
| C  | -4.904007 | 1.248678  | 1.103772  |
| C  | -4.845946 | 2.301492  | 0.192491  |
| H  | -3.811398 | 3.134304  | -1.503921 |
| H  | -5.664173 | 1.244852  | 1.880574  |
| H  | -5.561234 | 3.116543  | 0.256691  |
| C  | 1.932884  | -3.076974 | 2.373271  |
| H  | 1.210845  | -2.388438 | 2.829364  |
| H  | 1.359027  | -3.947782 | 2.036220  |

|   |           |           |           |
|---|-----------|-----------|-----------|
| H | 2.634007  | -3.406371 | 3.144618  |
| C | 1.834890  | -0.860310 | -2.182750 |
| H | 1.529056  | -1.691901 | -2.829350 |
| H | 0.920212  | -0.349900 | -1.875313 |
| H | 2.435020  | -0.176204 | -2.788846 |
| C | -4.047343 | -0.945735 | 2.034229  |
| H | -4.181155 | -1.915466 | 1.541638  |
| H | -3.108680 | -1.009949 | 2.597798  |
| H | -4.868752 | -0.808164 | 2.742301  |
| C | -1.847273 | 1.282759  | -1.938578 |
| H | -0.869323 | 1.283096  | -1.450023 |
| H | -1.882936 | 0.394247  | -2.579128 |
| H | -1.923483 | 2.166878  | -2.577284 |
| C | 1.670938  | 1.998753  | -0.435514 |
| H | 1.183479  | 1.986412  | -1.403386 |
| H | 2.508705  | 1.320978  | -0.323562 |
| F | 0.413313  | 0.874924  | 0.579421  |
| C | 1.629308  | 3.245966  | 0.368221  |
| H | 0.611472  | 3.653720  | 0.371215  |
| H | 1.888899  | 3.020946  | 1.408547  |
| C | 2.603251  | 4.322807  | -0.174443 |
| H | 3.623418  | 3.916310  | -0.190874 |
| H | 2.347530  | 4.556470  | -1.216904 |
| C | 2.578540  | 5.610019  | 0.660852  |
| H | 1.555498  | 6.008815  | 0.678084  |
| H | 2.829033  | 5.367402  | 1.702075  |
| C | 3.541523  | 6.677457  | 0.132590  |
| H | 3.292795  | 6.958367  | -0.897302 |
| H | 3.508025  | 7.585581  | 0.743528  |
| H | 4.574790  | 6.311724  | 0.134527  |

**TS (concerted) for C<sub>5</sub>H<sub>11</sub>F**

SCF energy: -1464.36862410 a.u.

SCF energy in solution: -1464.70714368 a.u.

Free energy in solution: -1464.20806168 a.u.

1 imaginary frequency: -428.74 cm<sup>-1</sup>

|    |           |           |           |
|----|-----------|-----------|-----------|
| N  | 2.324232  | -0.404238 | 0.012167  |
| C  | 2.702939  | -1.487509 | -0.673954 |
| C  | 1.859940  | -2.589615 | -0.902836 |
| C  | 0.480521  | -2.648208 | -0.647616 |
| N  | -0.175439 | -1.694717 | 0.019788  |
| H  | 2.293483  | -3.431548 | -1.427329 |
| Al | 0.644194  | -0.180967 | 1.071519  |
| C  | 4.092870  | -1.538051 | -1.275394 |
| H  | 4.857610  | -1.330423 | -0.521807 |



|   |           |           |           |
|---|-----------|-----------|-----------|
| H | 4.292902  | -2.511681 | -1.725916 |
| H | 4.201122  | -0.768705 | -2.047026 |
| C | -0.286912 | -3.836881 | -1.189984 |
| H | -0.973567 | -3.526064 | -1.984063 |
| H | 0.388635  | -4.591966 | -1.595708 |
| H | -0.900573 | -4.293694 | -0.407803 |
| C | 3.225940  | 0.715413  | 0.084997  |
| C | 4.123539  | 0.816850  | 1.166006  |
| C | 3.165760  | 1.709065  | -0.912125 |
| C | 4.970802  | 1.929407  | 1.227081  |
| C | 4.032379  | 2.803561  | -0.815785 |
| C | 4.929788  | 2.916672  | 0.244572  |
| H | 5.668286  | 2.016595  | 2.056200  |
| H | 3.997285  | 3.574207  | -1.581658 |
| H | 5.594987  | 3.773421  | 0.305782  |
| C | -1.608907 | -1.704356 | 0.026812  |
| C | -2.294059 | -1.105394 | -1.051764 |
| C | -2.307328 | -2.219372 | 1.137544  |
| C | -3.689047 | -1.012878 | -0.991177 |
| C | -3.702909 | -2.100006 | 1.162957  |
| C | -4.392515 | -1.497034 | 0.111852  |
| H | -4.224502 | -0.546805 | -1.814640 |
| H | -4.249738 | -2.488077 | 2.018320  |
| H | -5.474791 | -1.410800 | 0.148369  |
| C | 4.169920  | -0.253594 | 2.228721  |
| H | 3.200454  | -0.340614 | 2.734069  |
| H | 4.389329  | -1.239711 | 1.803697  |
| H | 4.933419  | -0.028993 | 2.978324  |
| C | 2.174868  | 1.602788  | -2.046157 |
| H | 2.220207  | 0.626395  | -2.540074 |
| H | 1.155266  | 1.717557  | -1.665686 |
| H | 2.356667  | 2.375150  | -2.798623 |
| C | -1.562333 | -2.878654 | 2.271680  |
| H | -0.962754 | -3.724941 | 1.918096  |
| H | -0.861455 | -2.175526 | 2.738047  |
| H | -2.252864 | -3.244686 | 3.036168  |
| C | -1.526441 | -0.549574 | -2.226748 |
| H | -0.778683 | 0.167888  | -1.880629 |
| H | -0.986865 | -1.332715 | -2.770936 |
| H | -2.196693 | -0.051787 | -2.933058 |
| C | -1.697011 | 1.538707  | 1.181729  |
| H | -2.064719 | 0.560064  | 1.466978  |
| H | -1.242855 | 2.102028  | 1.988209  |
| F | -0.168036 | 1.188133  | 0.129127  |
| C | -2.455955 | 2.258162  | 0.119266  |
| H | -1.968908 | 3.205328  | -0.133860 |

|   |           |          |           |
|---|-----------|----------|-----------|
| H | -2.491296 | 1.647834 | -0.786333 |
| C | -3.907584 | 2.505107 | 0.591220  |
| H | -4.362389 | 1.541251 | 0.854629  |
| H | -3.911098 | 3.116839 | 1.503279  |
| C | -4.756483 | 3.186252 | -0.490193 |
| H | -4.739298 | 2.567048 | -1.397288 |
| H | -4.296658 | 4.144881 | -0.764608 |
| C | -6.204670 | 3.413104 | -0.047192 |
| H | -6.793622 | 3.894900 | -0.834499 |
| H | -6.692519 | 2.463921 | 0.202461  |
| H | -6.250236 | 4.051717 | 0.842279  |

TS (F<sup>-</sup> transfer) for C<sub>6</sub>H<sub>11</sub>F

SCF energy: -1502.48983960 a.u.

SCF energy in solution: -1502.83891578 a.u.

Free energy in solution: -1502.33109078 a.u.

1 imaginary frequency: -61.38 cm<sup>-1</sup>

|    |           |           |           |
|----|-----------|-----------|-----------|
| C  | 0.030548  | 2.800808  | -0.315422 |
| C  | 1.302620  | 3.372692  | 0.204033  |
| C  | 1.330397  | 4.895477  | -0.116839 |
| C  | 0.065241  | 5.589341  | 0.414256  |
| C  | -1.215886 | 4.928241  | -0.120196 |
| C  | -1.227577 | 3.405305  | 0.201161  |
| H  | 2.231515  | 5.345139  | 0.317964  |
| H  | 1.336416  | 3.245926  | 1.293055  |
| H  | 2.177054  | 2.865250  | -0.212897 |
| H  | 0.026840  | 2.429988  | -1.335210 |
| H  | 0.063093  | 5.537741  | 1.512036  |
| H  | 0.079331  | 6.653203  | 0.148988  |
| H  | -2.106391 | 5.400848  | 0.312109  |
| H  | -1.275442 | 5.069494  | -1.207760 |
| H  | -1.266979 | 3.279838  | 1.290140  |
| H  | -2.113719 | 2.920187  | -0.217706 |
| H  | 1.396566  | 5.035575  | -1.204183 |
| N  | -1.427641 | -1.537326 | -0.066839 |
| C  | -1.280526 | -2.563481 | -0.910966 |
| C  | -0.029370 | -3.105504 | -1.251272 |
| C  | 1.230933  | -2.587046 | -0.908071 |
| N  | 1.395331  | -1.562942 | -0.064639 |
| H  | -0.036593 | -3.957902 | -1.918419 |
| Al | -0.009992 | -0.744657 | 1.086816  |
| C  | -2.507736 | -3.173384 | -1.557008 |
| H  | -3.239524 | -3.469683 | -0.799641 |
| H  | -2.245843 | -4.046560 | -2.156768 |
| H  | -3.007401 | -2.444551 | -2.202855 |

|   |           |           |           |    |           |           |           |
|---|-----------|-----------|-----------|----|-----------|-----------|-----------|
| C | 2.447876  | -3.220369 | -1.551073 | N  | 1.999652  | -0.885147 | 0.098131  |
| H | 2.958180  | -2.503927 | -2.202527 | C  | 2.242745  | -2.124392 | -0.337757 |
| H | 2.171551  | -4.093215 | -2.144821 | C  | 1.244538  | -3.106936 | -0.462992 |
| H | 3.175634  | -3.523027 | -0.792377 | C  | -0.140176 | -2.915005 | -0.325043 |
| C | -2.732771 | -0.959960 | 0.109690  | N  | -0.677968 | -1.767230 | 0.097211  |
| C | -3.550166 | -1.380058 | 1.176266  | H  | 1.568219  | -4.087944 | -0.786797 |
| C | -3.145356 | 0.062130  | -0.767923 | Al | 0.291018  | -0.194461 | 0.880739  |
| C | -4.792018 | -0.756416 | 1.348504  | C  | 3.651464  | -2.505624 | -0.747014 |
| C | -4.392298 | 0.661257  | -0.561889 | H  | 4.365268  | -2.286218 | 0.052296  |
| C | -5.212889 | 0.257677  | 0.490677  | H  | 3.716392  | -3.565568 | -0.998624 |
| H | -5.431216 | -1.072935 | 2.168526  | H  | 3.969431  | -1.921755 | -1.616937 |
| H | -4.718175 | 1.450858  | -1.234406 | C  | -1.049971 | -4.067575 | -0.699985 |
| H | -6.177950 | 0.732904  | 0.641887  | H  | -1.650514 | -3.817383 | -1.580357 |
| C | 2.709721  | -1.006570 | 0.109971  | H  | -0.475639 | -4.969449 | -0.918787 |
| C | 3.139150  | 0.004494  | -0.772412 | H  | -1.755952 | -4.283905 | 0.107516  |
| C | 3.519894  | -1.434636 | 1.178833  | C  | 3.065966  | 0.080069  | 0.080074  |
| C | 4.395535  | 0.584375  | -0.568805 | C  | 3.852100  | 0.271056  | 1.233527  |
| C | 4.771530  | -0.830126 | 1.348701  | C  | 3.273166  | 0.851835  | -1.081191 |
| C | 5.209076  | 0.172833  | 0.486167  | C  | 4.854583  | 1.247730  | 1.204571  |
| H | 4.734345  | 1.365380  | -1.244951 | C  | 4.287385  | 1.816044  | -1.069541 |
| H | 5.405198  | -1.152967 | 2.170558  | C  | 5.073839  | 2.017015  | 0.063641  |
| H | 6.181582  | 0.633216  | 0.635576  | H  | 5.467211  | 1.401199  | 2.089237  |
| C | -3.095852 | -2.478629 | 2.105116  | H  | 4.456883  | 2.414570  | -1.961136 |
| H | -2.168065 | -2.194483 | 2.616618  | H  | 5.856168  | 2.770886  | 0.056965  |
| H | -2.879089 | -3.404934 | 1.560975  | C  | -2.101614 | -1.594874 | 0.030447  |
| H | -3.856685 | -2.695944 | 2.859500  | C  | -2.678952 | -1.145296 | -1.175619 |
| C | -2.245474 | 0.494239  | -1.898777 | C  | -2.888903 | -1.810159 | 1.179235  |
| H | -2.107697 | -0.300481 | -2.641303 | C  | -4.057946 | -0.911328 | -1.210755 |
| H | -1.255619 | 0.737987  | -1.509482 | C  | -4.263656 | -1.552178 | 1.105647  |
| H | -2.651591 | 1.369064  | -2.414035 | C  | -4.847884 | -1.104212 | -0.078013 |
| C | 3.047932  | -2.521599 | 2.112540  | H  | -4.511389 | -0.564360 | -2.135932 |
| H | 2.817143  | -3.446943 | 1.572478  | H  | -4.877994 | -1.711478 | 1.988065  |
| H | 2.124392  | -2.220582 | 2.622068  | H  | -5.916105 | -0.910505 | -0.118870 |
| H | 3.804904  | -2.747127 | 2.868378  | C  | 3.618435  | -0.565990 | 2.466967  |
| C | 2.246180  | 0.446216  | -1.904989 | H  | 2.597966  | -0.423678 | 2.842580  |
| H | 1.259629  | 0.704159  | -1.516533 | H  | 3.727118  | -1.636212 | 2.256950  |
| H | 2.097973  | -0.348032 | -2.646008 | H  | 4.322868  | -0.301723 | 3.260329  |
| H | 2.664484  | 1.314367  | -2.421797 | C  | 2.410393  | 0.648564  | -2.303159 |
| F | 0.008435  | 0.996749  | 0.638103  | H  | 2.415341  | -0.394599 | -2.637572 |
|   |           |           |           | H  | 1.371027  | 0.901209  | -2.076221 |
|   |           |           |           | H  | 2.754521  | 1.272470  | -3.132749 |
|   |           |           |           | C  | -2.260257 | -2.315411 | 2.453931  |
|   |           |           |           | H  | -1.749053 | -3.271976 | 2.296346  |
|   |           |           |           | H  | -1.500147 | -1.612524 | 2.816487  |
|   |           |           |           | H  | -3.011801 | -2.454414 | 3.235853  |
|   |           |           |           | C  | -1.816518 | -0.888932 | -2.387492 |

TS (concerted) for C<sub>6</sub>H<sub>11</sub>F  
SCF energy: -1502.48961829 a.u.  
SCF energy in solution: -1502.83673633 a.u.  
Free energy in solution: -1502.32637333 a.u.  
1 imaginary frequency: -384.68 cm<sup>-1</sup>

|   |           |           |           |
|---|-----------|-----------|-----------|
| H | -1.062513 | -0.132838 | -2.153255 |
| H | -1.275579 | -1.787005 | -2.705077 |
| H | -2.420188 | -0.543435 | -3.231386 |
| F | -0.164031 | 1.014041  | -0.432407 |
| C | -2.576254 | 2.013570  | 0.222430  |
| C | -1.169314 | 2.377138  | 0.545915  |
| C | -0.586873 | 3.541817  | -0.181460 |
| C | -1.464767 | 4.779378  | 0.157457  |
| C | -2.939226 | 4.509618  | -0.180990 |
| C | -3.458137 | 3.256658  | 0.539666  |
| H | 0.455930  | 3.703798  | 0.101557  |
| H | -0.834634 | 2.208376  | 1.564854  |
| H | -2.671516 | 1.771512  | -0.840841 |
| H | -2.911765 | 1.141624  | 0.786743  |
| H | -1.369261 | 5.015396  | 1.225386  |
| H | -1.086565 | 5.646955  | -0.395217 |
| H | -3.552557 | 5.378844  | 0.083906  |
| H | -3.039476 | 4.369750  | -1.266346 |
| H | -3.463016 | 3.431140  | 1.623457  |
| H | -4.491250 | 3.033544  | 0.249831  |
| H | -0.621167 | 3.368486  | -1.262563 |

**TS (F<sup>-</sup> transfer) for C<sub>6</sub>H<sub>2</sub>F<sub>4</sub>**

SCF energy: -1796.50650700 a.u.

SCF energy in solution: -1796.96659613 a.u.

Free energy in solution: -1796.55476613 a.u.

1 imaginary frequency: -384.07 cm<sup>-1</sup>

|    |           |          |           |
|----|-----------|----------|-----------|
| N  | 0.051289  | 2.283763 | -0.075633 |
| C  | 0.719155  | 2.978029 | -1.008589 |
| C  | 2.020501  | 2.650099 | -1.416244 |
| C  | 2.734002  | 1.490207 | -1.067465 |
| N  | 2.318361  | 0.634910 | -0.125395 |
| H  | 2.477175  | 3.297789 | -2.153448 |
| Al | 0.850559  | 0.959229 | 1.153391  |
| C  | 0.047030  | 4.158853 | -1.676582 |
| H  | -0.359008 | 4.846398 | -0.928710 |
| H  | 0.747786  | 4.700532 | -2.313922 |
| H  | -0.797434 | 3.832404 | -2.291180 |
| C  | 4.015332  | 1.201111 | -1.819579 |
| H  | 3.907538  | 0.295217 | -2.424336 |
| H  | 4.280115  | 2.029031 | -2.479133 |
| H  | 4.842627  | 1.016206 | -1.128552 |
| C  | -1.352120 | 2.544962 | 0.106615  |
| C  | -1.785217 | 3.379594 | 1.154095  |
| C  | -2.271430 | 1.914778 | -0.756617 |

|   |           |           |           |
|---|-----------|-----------|-----------|
| C | -3.161841 | 3.564834  | 1.331848  |
| C | -3.638807 | 2.127835  | -0.546685 |
| C | -4.084565 | 2.943540  | 0.493159  |
| H | -3.507593 | 4.205201  | 2.138833  |
| H | -4.356447 | 1.643739  | -1.204044 |
| H | -5.148901 | 3.095210  | 0.647161  |
| C | 3.045184  | -0.595377 | 0.062725  |
| C | 2.690156  | -1.714609 | -0.712686 |
| C | 4.059348  | -0.666476 | 1.036788  |
| C | 3.374014  | -2.915831 | -0.499768 |
| C | 4.720511  | -1.886638 | 1.217531  |
| C | 4.382680  | -3.004704 | 0.457253  |
| H | 3.101715  | -3.789126 | -1.086008 |
| H | 5.506242  | -1.955317 | 1.965169  |
| H | 4.902354  | -3.945580 | 0.613932  |
| C | -0.787193 | 4.061793  | 2.056361  |
| H | -0.203590 | 3.325079  | 2.622758  |
| H | -0.065429 | 4.654276  | 1.483178  |
| H | -1.287599 | 4.724633  | 2.766897  |
| C | -1.787120 | 1.023371  | -1.874460 |
| H | -1.207489 | 1.579349  | -2.619818 |
| H | -1.131762 | 0.238173  | -1.489001 |
| H | -2.626268 | 0.546820  | -2.387226 |
| C | 4.426648  | 0.545056  | 1.858775  |
| H | 4.704462  | 1.396468  | 1.227202  |
| H | 3.578535  | 0.874699  | 2.470982  |
| H | 5.265620  | 0.327151  | 2.524659  |
| C | 1.591006  | -1.616255 | -1.741124 |
| H | 0.656730  | -1.289754 | -1.277868 |
| H | 1.827078  | -0.888624 | -2.526009 |
| H | 1.412998  | -2.583532 | -2.216858 |
| F | -0.341720 | -0.490493 | 1.099261  |
| C | -2.760172 | -1.381456 | 0.354082  |
| C | -3.642012 | -2.414322 | 0.043557  |
| C | -3.171011 | -3.720136 | -0.116651 |
| C | -1.819821 | -4.017847 | 0.022261  |
| C | -0.941400 | -2.980755 | 0.338147  |
| C | -1.423196 | -1.698522 | 0.459469  |
| H | -1.467076 | -5.035541 | -0.106064 |
| H | -3.132016 | -0.368754 | 0.473484  |
| F | 0.371177  | -3.252531 | 0.481347  |
| F | -4.045671 | -4.695494 | -0.413316 |
| F | -4.957468 | -2.172549 | -0.103543 |

**TS (concerted) for C<sub>6</sub>H<sub>2</sub>F<sub>4</sub>**

SCF energy: -1796.52075475 a.u.

SCF energy in solution: -1796.97771427 a.u.

Free energy in solution: -1796.56573727 a.u.

1 imaginary frequency: -303.75 cm<sup>-1</sup>

|    |           |           |           |
|----|-----------|-----------|-----------|
| N  | 2.076790  | -0.931247 | -0.025444 |
| C  | 2.404819  | -2.167569 | -0.426684 |
| C  | 1.475644  | -3.214611 | -0.535497 |
| C  | 0.091487  | -3.143618 | -0.318179 |
| N  | -0.534621 | -2.013754 | 0.038805  |
| H  | 1.868694  | -4.178848 | -0.830636 |
| Al | 0.307411  | -0.308513 | 0.567293  |
| C  | 3.846475  | -2.473073 | -0.773037 |
| H  | 4.504552  | -2.255723 | 0.073559  |
| H  | 3.970874  | -3.518715 | -1.058390 |
| H  | 4.185164  | -1.840153 | -1.599129 |
| C  | -0.714023 | -4.414262 | -0.489326 |
| H  | -1.438742 | -4.318768 | -1.302888 |
| H  | -0.065835 | -5.266424 | -0.698993 |
| H  | -1.290911 | -4.622894 | 0.417129  |
| C  | 3.126425  | 0.053032  | 0.103335  |
| C  | 3.779778  | 0.187303  | 1.344655  |
| C  | 3.453786  | 0.876532  | -0.989676 |
| C  | 4.773708  | 1.162949  | 1.474305  |
| C  | 4.456975  | 1.837630  | -0.818883 |
| C  | 5.112793  | 1.984373  | 0.400957  |
| H  | 5.283076  | 1.275512  | 2.427675  |
| H  | 4.719091  | 2.479108  | -1.656081 |
| H  | 5.887168  | 2.737464  | 0.515382  |
| C  | -1.973758 | -2.009852 | 0.125027  |
| C  | -2.738595 | -1.814841 | -1.045100 |
| C  | -2.589662 | -2.151083 | 1.384690  |
| C  | -4.131806 | -1.738243 | -0.922471 |
| C  | -3.984157 | -2.061046 | 1.462082  |
| C  | -4.753102 | -1.849274 | 0.320281  |
| H  | -4.731204 | -1.585086 | -1.815914 |
| H  | -4.466562 | -2.161013 | 2.430555  |
| H  | -5.834063 | -1.778198 | 0.396454  |
| C  | 3.409904  | -0.699041 | 2.509066  |
| H  | 2.373927  | -0.518747 | 2.822776  |
| H  | 3.479085  | -1.762122 | 2.253267  |
| H  | 4.061193  | -0.511976 | 3.366750  |
| C  | 2.727581  | 0.756683  | -2.306954 |
| H  | 2.587933  | -0.285275 | -2.609667 |
| H  | 1.731786  | 1.201197  | -2.231077 |
| H  | 3.273491  | 1.274230  | -3.100304 |
| C  | -1.764970 | -2.400688 | 2.624032  |

|   |           |           |           |
|---|-----------|-----------|-----------|
| H | -1.092657 | -3.255999 | 2.495397  |
| H | -1.132162 | -1.535410 | 2.857436  |
| H | -2.405643 | -2.595974 | 3.487805  |
| C | -2.088239 | -1.661548 | -2.400299 |
| H | -1.572408 | -0.701061 | -2.478284 |
| H | -1.337391 | -2.433681 | -2.591680 |
| H | -2.837102 | -1.714597 | -3.194863 |
| F | -0.293814 | 0.647231  | -1.228250 |
| C | -2.253099 | 4.038529  | 0.232371  |
| C | -2.972486 | 2.867039  | -0.006708 |
| C | -2.329024 | 1.678247  | -0.315652 |
| C | -0.924924 | 1.642652  | -0.293352 |
| C | -0.216672 | 2.846940  | -0.157752 |
| C | -0.860626 | 4.026383  | 0.166805  |
| F | -4.317317 | 2.905828  | 0.045474  |
| F | -2.909322 | 5.178638  | 0.520130  |
| F | 1.132298  | 2.805113  | -0.205036 |
| H | -2.912273 | 0.781098  | -0.481053 |
| H | -0.292610 | 4.929189  | 0.357351  |

TS (concerted) for C<sub>6</sub>F<sub>6</sub>

SCF energy: -1994.95853173 a.u.

SCF energy in solution: -1995.48878690 a.u.

Free energy in solution: -1995.09380090 a.u.

1 imaginary frequency: -227.01 cm<sup>-1</sup>

|    |           |           |           |
|----|-----------|-----------|-----------|
| N  | 1.415214  | -1.831480 | -0.055075 |
| C  | 1.254538  | -3.105562 | -0.447928 |
| C  | -0.001059 | -3.696186 | -0.646751 |
| C  | -1.256325 | -3.104723 | -0.448295 |
| N  | -1.416289 | -1.830548 | -0.055445 |
| H  | -0.001358 | -4.731010 | -0.963310 |
| Al | -0.000159 | -0.557872 | 0.417499  |
| C  | 2.475265  | -3.973778 | -0.665615 |
| H  | 3.067993  | -4.036919 | 0.252412  |
| H  | 2.190909  | -4.981762 | -0.970821 |
| H  | 3.131516  | -3.545627 | -1.428171 |
| C  | -2.477557 | -3.972112 | -0.666455 |
| H  | -3.133131 | -3.543563 | -1.429373 |
| H  | -2.193759 | -4.980320 | -0.971440 |
| H  | -3.070776 | -4.034752 | 0.251288  |
| C  | 2.764807  | -1.352943 | 0.148844  |
| C  | 3.322629  | -1.421752 | 1.439887  |
| C  | 3.483785  | -0.815355 | -0.934807 |
| C  | 4.619338  | -0.932782 | 1.632636  |
| C  | 4.779059  | -0.341518 | -0.699969 |

|   |           |           |           |   |           |           |           |
|---|-----------|-----------|-----------|---|-----------|-----------|-----------|
| C | 5.344847  | -0.394999 | 0.571843  | C | -2.542891 | -2.009754 | 2.588889  |
| H | 5.059488  | -0.977638 | 2.625186  | H | -2.166715 | -3.011817 | 2.355218  |
| H | 5.342984  | 0.081234  | -1.526944 | H | -1.667308 | -1.393294 | 2.829452  |
| H | 6.350079  | -0.018008 | 0.736230  | H | -3.161125 | -2.078634 | 3.487615  |
| C | -2.765652 | -1.351225 | 0.148227  | C | -2.867754 | -0.713970 | -2.309243 |
| C | -3.484212 | -0.813229 | -0.935500 | H | -2.067607 | 0.030004  | -2.313983 |
| C | -3.323714 | -1.419792 | 1.439185  | H | -2.425243 | -1.660222 | -2.636542 |
| C | -4.779280 | -0.338742 | -0.700819 | H | -3.615071 | -0.415644 | -3.049001 |
| C | -4.620189 | -0.930147 | 1.631778  | F | -0.000261 | 0.707433  | -1.506372 |
| C | -5.345276 | -0.391957 | 0.570906  | C | 0.001542  | 4.482745  | 0.281231  |
| H | -5.342879 | 0.084308  | -1.527865 | C | -1.201837 | 3.805557  | 0.077960  |
| H | -5.060496 | -0.974810 | 2.624268  | C | -1.199027 | 2.495247  | -0.376006 |
| H | -6.350341 | -0.014459 | 0.735159  | C | 0.000520  | 1.774367  | -0.504703 |
| C | 2.541302  | -2.011243 | 2.589492  | C | 1.200494  | 2.494838  | -0.377710 |
| H | 1.665990  | -1.394324 | 2.829861  | C | 1.204398  | 3.805165  | 0.076225  |
| H | 2.164653  | -3.013126 | 2.355813  | F | -2.370194 | 1.843650  | -0.506779 |
| H | 3.159341  | -2.080389 | 3.488332  | F | -2.364500 | 4.437621  | 0.294442  |
| C | 2.867516  | -0.716029 | -2.308631 | F | 0.002031  | 5.768002  | 0.665099  |
| H | 2.425932  | -1.662561 | -2.636405 | F | 2.367582  | 4.436875  | 0.290921  |
| H | 2.066719  | 0.027237  | -2.313251 | F | 2.371282  | 1.842935  | -0.510367 |
| H | 3.614729  | -0.416758 | -3.048110 |   |           |           |           |
